# Supplementary material
Source: Elsevier journal article supplement (https://www.sciencedirect.com/science/article/pii/S2531137921000602)
Supplement: mmc2 [file S2531137921000602:mmc2.doc]

| **MoAb** | **FL** | **Clone** | **Commercial Source** | **Volume (µL)** | **MoAb** | **FL** | **Clone** | **Commercial Source** | **Volume (µL)** | **MoAb** | **FL** | **Clone** | **Commercial Source** | **Volume**  **(µL)** |
| --- | --- | --- | --- | --- | --- | --- | --- | --- | --- | --- | --- | --- | --- | --- |
| CD2 | FITC | RPA-2.10 | BD Pharmigen | 5 | CD3 | PE | SK7 | BD | 10 | CD3 | PerCPcy5.5 | SK7 | BD | 5 |
| CD7 | FITC | 4H9 | BD | 10 | CD7 | PE | M-T701 | BD Pharmigen | 10 | CD5 | PerCPcy5.5 | L17F12 | BD | 10 |
| CD8 | FITC | SK1 | BD | 5 | CD9 | PE | M-L13 | BD | 20 | CD19 | PerCPcy5.5 | SJ25C2 | BD | 5 |
| CD15 | FITC | MMA | BD | 10 | CD10 | PE | MEM78 | BD | 5 | CD34 | PerCPcy5.5 | 8G12 | BD | 5 |
| CD16 | FITC | NKP15 | BD | 20 | CD13 | PE | L138 | BD | 5 | CD45 | PerCPcy5.5 | 2D1 | BD | 10 |
| CD20 | FITC | L27 | BD | 10 | CD19 | PE | SJ25C1 | BD | 10 | CD1a | APC | HI149 | BD | 5 |
| CD36 | FITC | CB38 | BD Pharmigen | 5 | CD22 | PE | S-HCL-1 | BD | 5 | CD3 | APC | SK7 | BD | 1 |
| CD38 | FITC | HB7 | BD | 10 | CD25 | PE | 2A3 | BD | 20 | CD4 | APC | SK3 | BD | 5 |
| CD42b | FITC | HIP1 | BD Pharmigen | 10 | CD33 | PE | P67.6 | BD | 10 | CD10 | APC | HI10A | BD | 2 |
| CD44 | FITC | G44-26 | BD Pharmigen | 10 | CD56 | PE | MY31 | BD | 10 | CD11b | APC | D12 | BD | 2 |
| CD45 | FITC | 2D1 | BD | 10 | CD64 | PE | 10.1 | BD | 10 | CD14 | APC | MɸP9 | BD | 3 |
| CD58 | FITC | 1C3 | BD Pharmigen | 10 | CD66c | PE | KOR-SA3544 | Beckmann Coulter | 5 | CD19 | APC | SJ25C1 | BD Pharmigen | 10 |
| CD61 | FITC | RUU-PL7F12 | BD | 10 | CD79a | PE | HM47 | BD | 20 | CD22 | APC | S-HCL-1 | BD | 2 |
| CD65 | FITC | 88H7 | Beckman Coulter | 3 | CD99 | PE | TÜ12 | BD | 5 | CD34 | APC | 8G12 | BD | 5 |
| CD300e | FITC | UP-H2 | Miltenyi | 2 | CD105 | PE | 266 | Beckmann Coulter | 5 | CD45RA | APC | HI100 | BD | 5 |
| TdT | FITC | HT6 | Dako | 3 | CD117 | PE | 104D2 | BD | 5 | CD56 | APC | NCAM16.2 | BD | 5 |
| Lambda | FITC | 1-155-2 | BD | 10 | CD123 | PE | 9F5 | BD | 5 | CD71 | APC | M-A712 | BD Pharmigen | 20 |
| TCRab | FITC | IP26 | Beckman Coulter | 5 | CD203c | PE | 97A6 | Beckmann Coulter | 5 | CD81 | APC | JS-81 | BD Pharmigen | 10 |
| IgM | FITC | Polyclonal | Dako | 5 | Kappa | PE | TB28-2 | BD | 10 | CD117 | APC | 104D2 | BD | 5 |
| MPO | FITC | 5B8 | BD | 20 | TCRgd | PE | B1 | BD | 10 | CD123 | APC | 9F5 | BD | 2,5 |
| HLADR | FITC | L243  (G46-6) | BD | 10 | NG2 | PE | 7.1 | Beckmann Coulter | 5 | SmIgM | APC | G20-127 | BD Pharmigen | 20 |

Table S-1: Fluorochromes, clones and post-titration volume of monoclonal antibodies (MoAb) used in the panels.
